# Supplementary material for: Type I IFNs link skin-associated dysbiotic commensal bacteria to pathogenic inflammation and angiogenesis in rosacea
Source: PubMed Central journal article supplement (PMC9977509; doi:10.1172/jci.insight.151846), 2023-02-22
Supplement: jciinsight-8-151846-s222.pdf [file jciinsight-8-151846-s222.pdf]

# Supplementary Figure 1

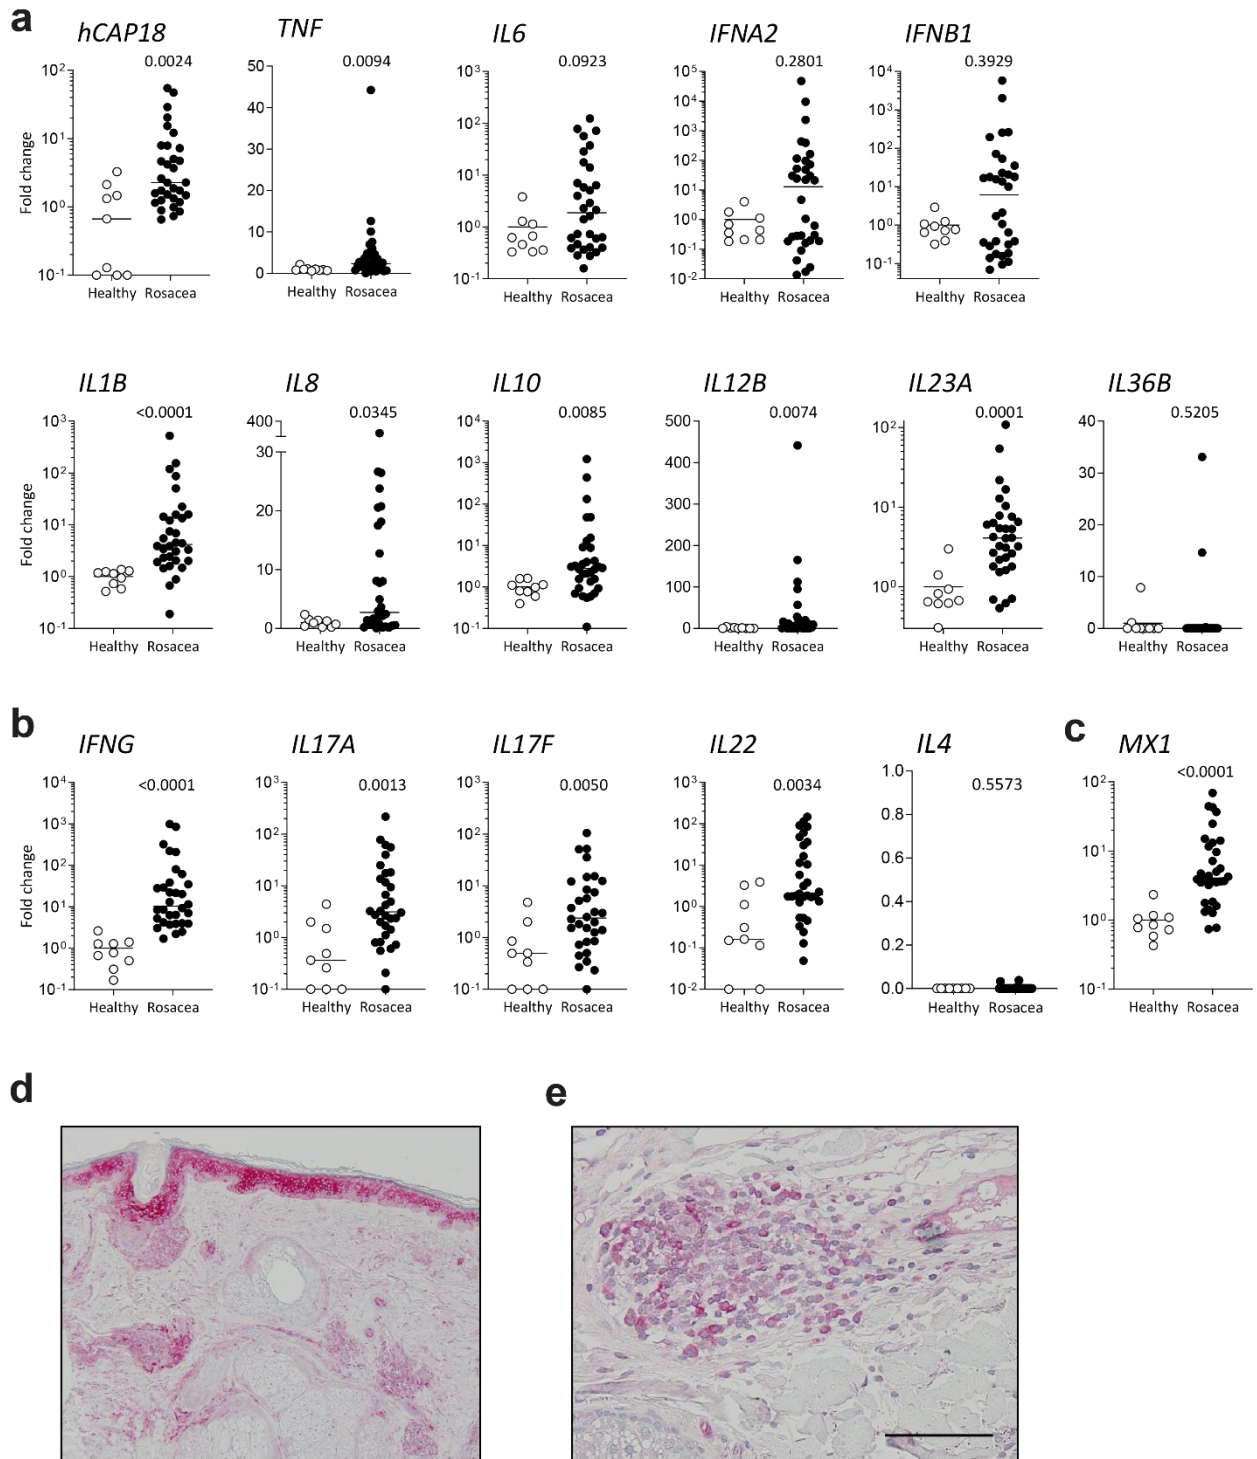

**Fig. S1: Inflammatory cytokine profile in lesions of rosacea, and MxA staining** (a) Gene expression of innate and (b) adaptive inflammatory genes from biopsies of lesions of rosacea (black, n=32) as compared to healthy skin (white, n=9). (c) *MXI* expression comparison between healthy skin and rosacea lesions. P-values of two-tailed Mann-Whitney nonparametric unpaired t-test are depicted. (d) MxA staining of rosacea in whole skin, and (e) of dermal infiltrate. Scale bar represents 100µm.

## Supplementary Figure 2

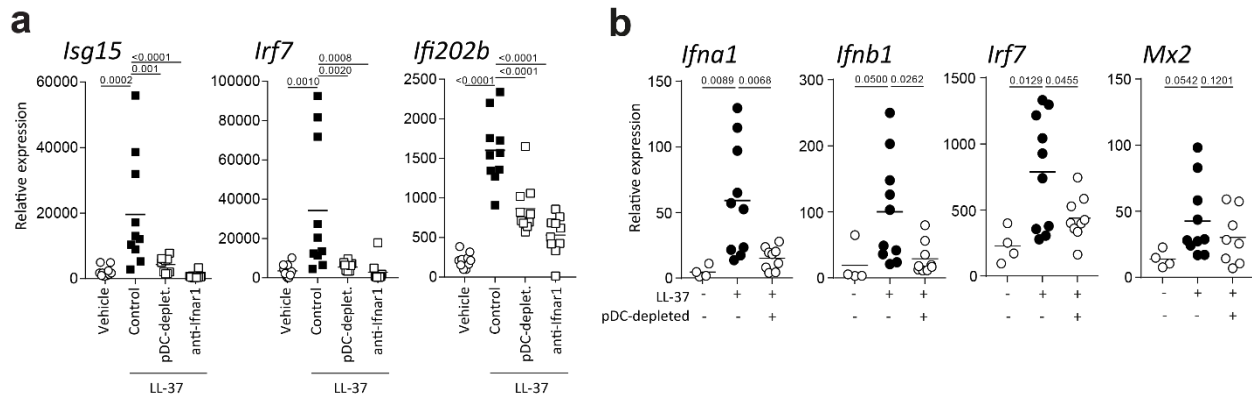

**Fig. S2: Type I Interferon and response genes require pDCs *in vivo*.** Gene expression from biopsies following LL-37 intradermal injection in mice (a) depleted of pDCs via antibody-mediated targeting or blocked of type I interferon signalling, (b) or depleted of pDCs via diphtheria toxin injection in BDCA2-DTR transgenic mice. Multiplicity adjusted P-values of one-way ANOVA are depicted.

## Supplementary figure 3

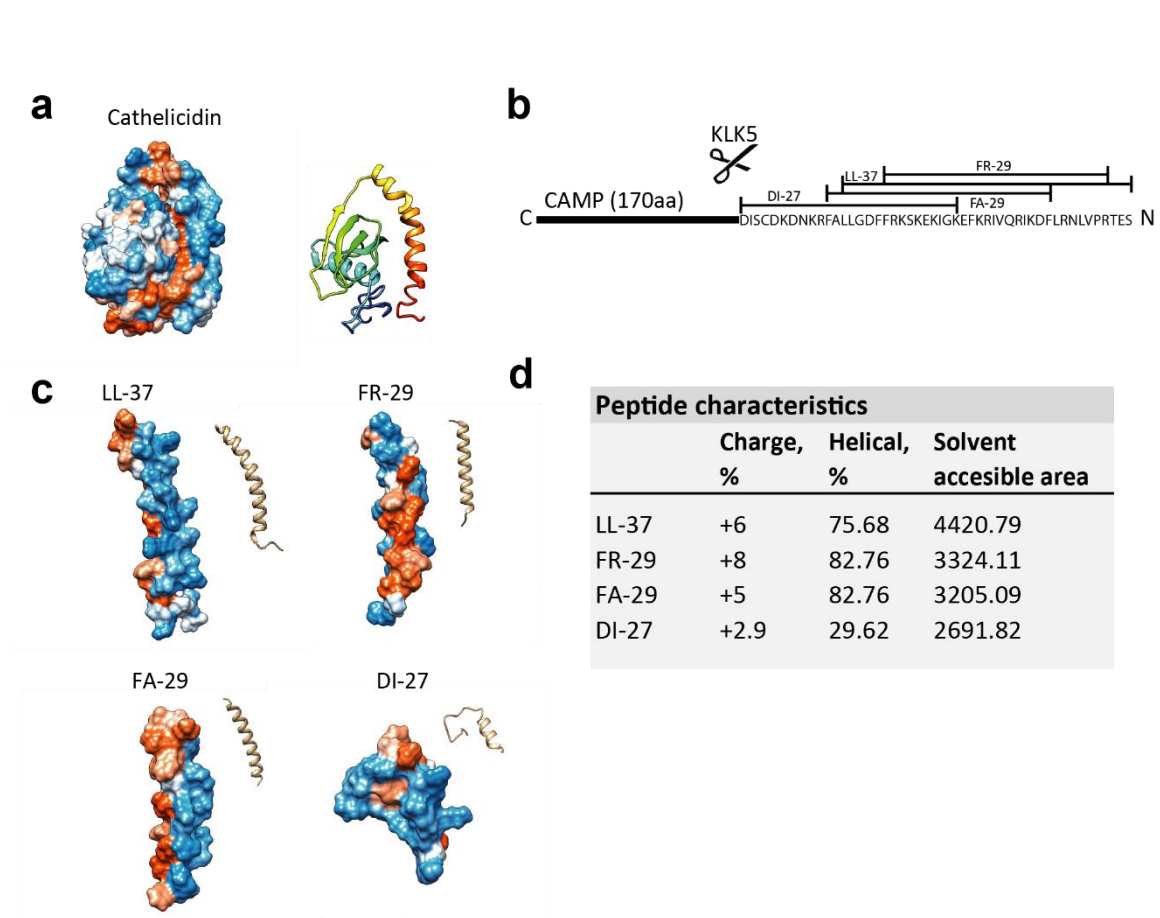

**Fig. S3: Cathelicidin peptides described in rosacea.** (a) Cathelicidin structure prediction with hydrophobicity colouring of residues depicted (phobic to philic: red to blue). Ribbon representation coloured N- (blue) to C-terminus (red). (b) Cathelicidin Antimicrobial Peptide (CAMP) processing by Kallikrein 5 (KLK5) yields different sized antimicrobial peptides DI-27, FA-29, LL-37, and FR-29 as described elsewhere.(13) (c) Structure prediction and ribbon representation of cathelicidin antimicrobial peptides, and (d) their accompanying characteristics. Predictions obtained using I-TASSER.(70, 71)

# Supplementary figure 4

**a**

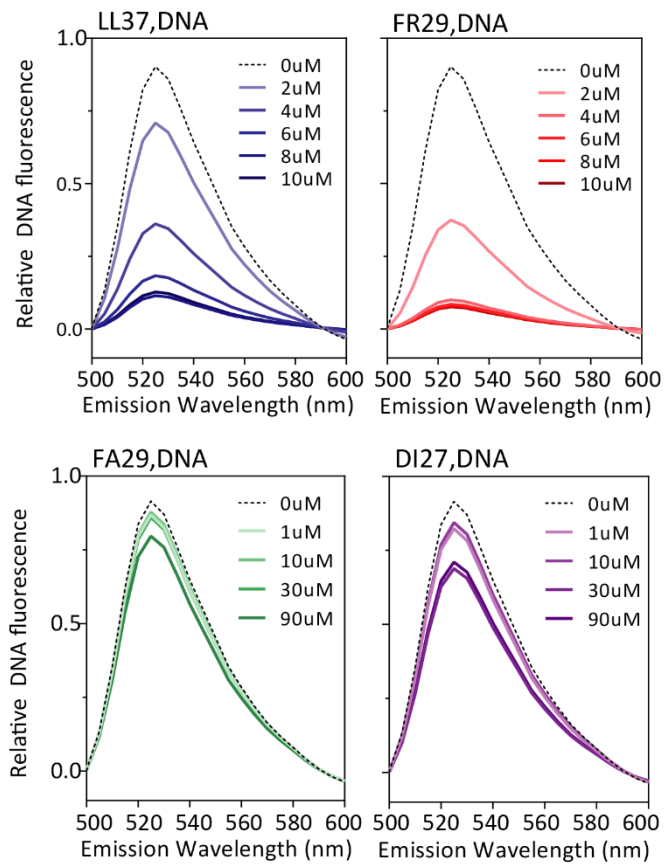

**b**

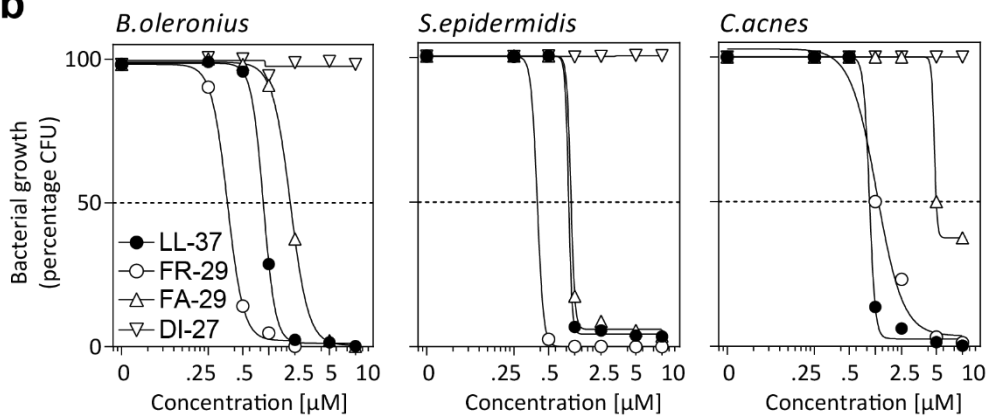

**c**

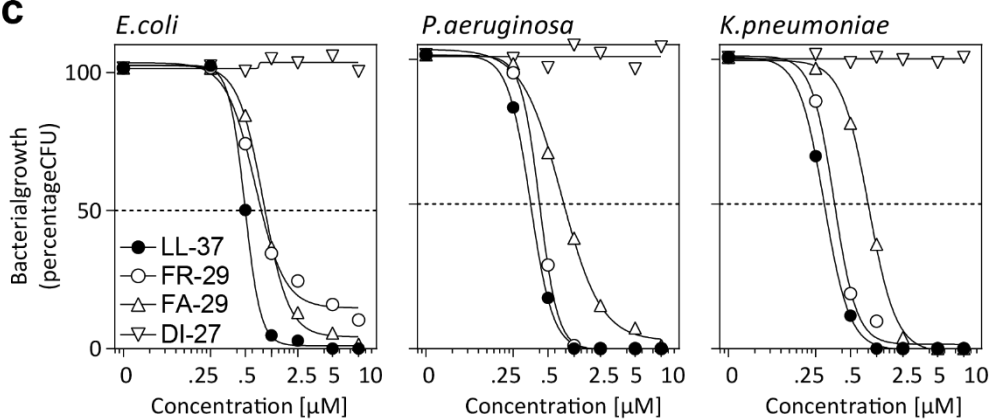

**Fig. S4: Differential DNA binding capacities and bacterial killing of cathelicidin antimicrobial peptides described in rosacea skin lesions.** (a) Human DNA (2 $\mu$ g) was incubated with varying molar concentrations of the indicated cathelicidin peptides, and unbound free DNA was quantified by picogreen dye. (b) Skin- and (c) gut- and respiratory tract-associated bacterial killing assay by indicated cathelicidins. Bacteria CFU counts were determined after 18h culture in their appropriate culture conditions and the corresponding  $10^5$  CFUs were incubated with the indicated peptides at the indicated concentration for 2h, followed by plating and culturing for 18h. CFUs were counted and calculated as relative percentage of control cultures.

# Supplementary Figure 5

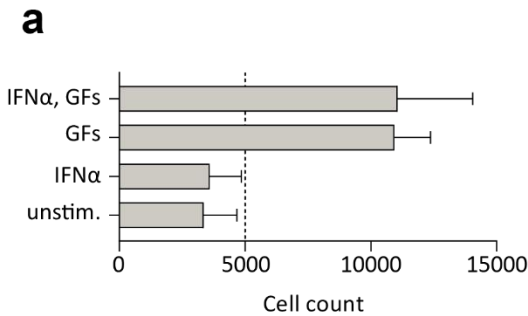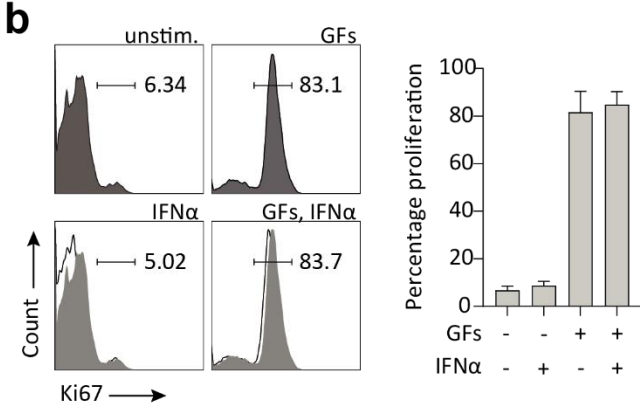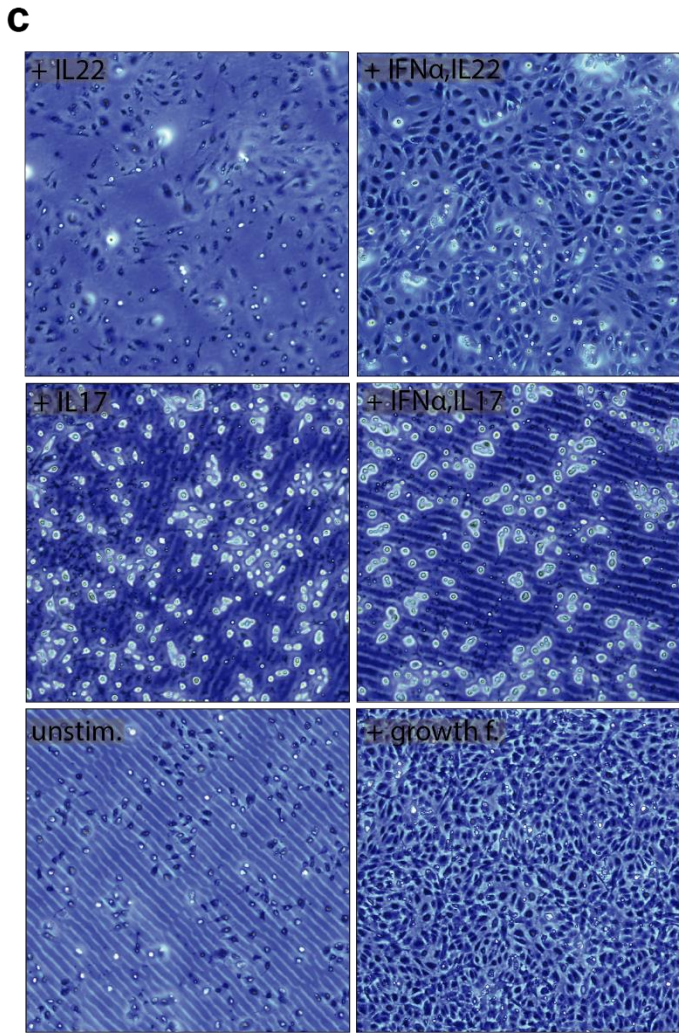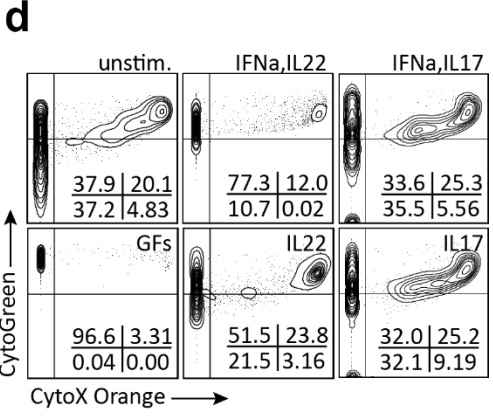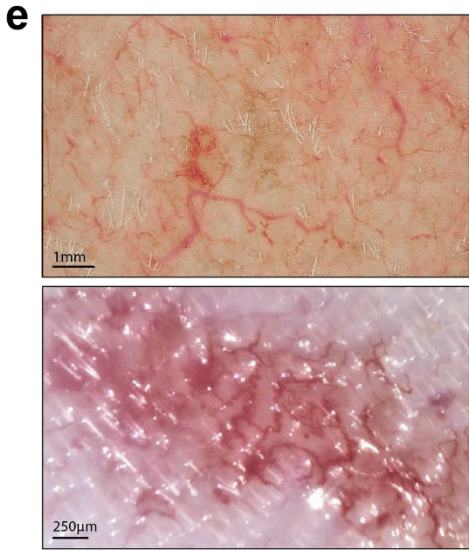

**Fig. S5: IFN $\alpha$  does not directly induce Huvec proliferation or survival, despite participating in the observed angiogenesis *in vivo*.** (a) Cell survival of Huvec stimulated with or without IFN $\alpha$ , in the presence or absence of growth factors (GFs). (b) Huvec proliferation determined by KI67 staining of cells stimulated as in (a). (c) Huvec stimulated with indicated cytokines, left unstimulated, or with the growth factor cocktail, and visualised by light microscopy. (d) Huvec were stimulated with the indicated conditions as in (c) and survival assessed by SYTO®13 Green and SYTOX® Orange staining. (e) Representative images of rosacea skin taken with fotofinder (upper panel) and videocapillaroscopy images of LL-37 injection site (bottom panel).

# Supplementary figure 6

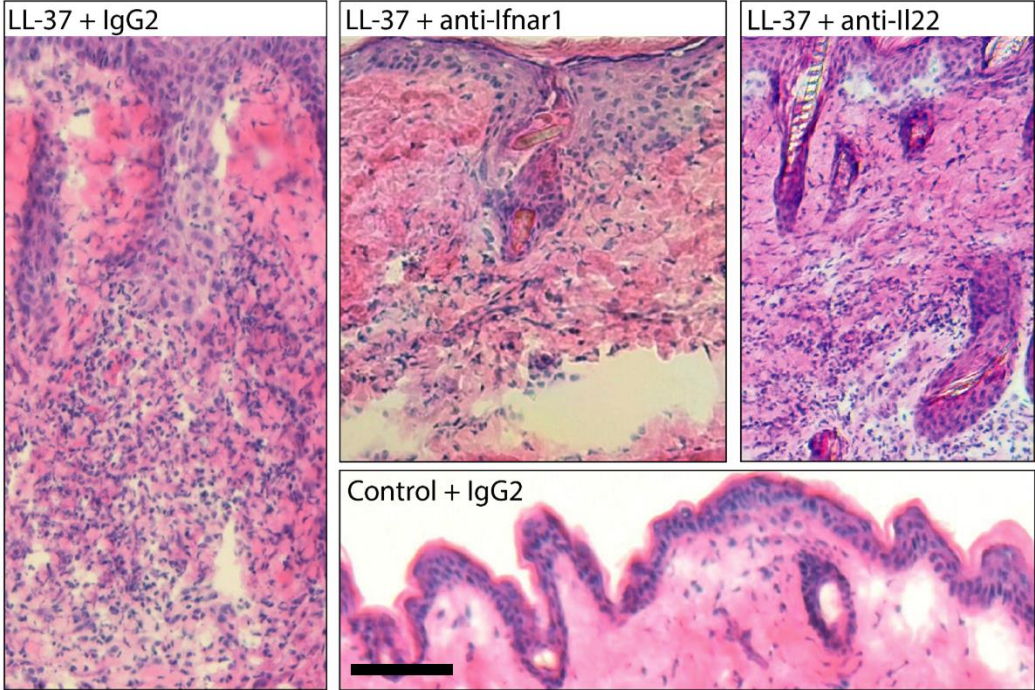

**Fig. S6:** H&E staining of selected sections from mice injected intradermally either with LL-37 or Saline, and which received either an anti-mouse Ifnar1 or Il22, or an IgG2 control. Dotted lines highlight lumens of dilated blood vessels. Scale bar represents 50 $\mu$ m.



**Supplementary Table 1: Patient characteristics**

| Phase  | Rosacea subtype (%) |       |      | Age at biopsy<br>(Median $\pm$ SD) | Gender (%) |    |
|--------|---------------------|-------|------|------------------------------------|------------|----|
|        | PPP                 | ETR   | Ph   |                                    | F          | M  |
| Stable | 83.33               | 38.88 | 5.55 | 57 $\pm$ 9.94, n=16                | 50         | 50 |
| Flare  | 50                  | 68.75 | 0    | 48.5 $\pm$ 11.57, n=16             | 50         | 50 |

*ETR: Erythematotelangiectatic, PPP: Papulopustular, Ph: Phymatous*

**Supplementary Table 2: Sequences of SybrGreen® primers used**

| Gene         | Forward (5'-3')             | Reverse (5'-3')                 |
|--------------|-----------------------------|---------------------------------|
| <i>GAPDH</i> | ACG CAT TTG GTC GTA TTG GG  | TGA TTT TGG AGG GAT CTC GC      |
| <i>IL6</i>   | GGTACA TCC TCG ACG GCA TCT  | GTG CCT CTT TGC TGC TTT CAC     |
| <i>IFNG</i>  | ACG TCT GCA TCG TTT TGG GTT | GTT CCA TTA TCC GCT ACA TCT GAA |
| <i>IL10</i>  | TCC TGA CTG GGG TGA GGG CC  | GGC AGG TTG CCT GGG AAG TGG     |
| <i>TNF</i>   | AGT GAT CGG CCC CCA GAG GG  | CAC GCC ATT GGC CAG GAG GG      |
| <i>IL36B</i> | TTC TGT GCA GAA ATT CAG GGC | TCC CTA TGT TAT CTT GGG AGC C   |
| <i>IL1B</i>  | CAC GAT GCA CCT GTA CGA TCA | AGA CAT CAC CAA GCT TTT TTG CT  |
| <i>MX1</i>   | AGA GAA GGT GAG AAG CTG ATC | TTC TTC CAG CTC CTT CTC TCT G   |
| <i>IFNA2</i> | TCC TGC TTG AAG GAC AGA CA  | TTT CAG CCT TTT GGA ACT GG      |
| <i>IFNB1</i> | CGA CAC TGT TCG TGT TGT CA  | GAA GCA CAA CAG GAG AGC AA      |
